# Supplementary material for: Anemia, iron deficiency, and cobalamin deficiency in cats with chronic gastrointestinal disease
Source: PubMed Central journal article supplement — J Vet Intern Med. 2020 Nov 23;35(1):172–8. doi: 10.1111/jvim.15962 (PMC7848310; doi:10.1111/jvim.15962), 2020-11-23
Supplement: JVIM-35-172-s001.pdf [file JVIM-35-172-s001.pdf]

**Supplement 1.**

**Client Questionnaire: Evaluation of Cats for Signs of Gastrointestinal Disease and Disease Severity**

**Feline Chronic Enteropathy Activity Index<sup>1</sup>**

1. How do you rate your cat's attitude/activity level?

- A. Normal
- B. Slightly decreased
- C. Moderately decreased
- D. Severely decreased

2. How do you rate your cat's appetite?

- A. Normal
- B. Slightly decreased (will still eat normal cat food)
- C. Moderately decreased (needs enticement or treats/novel food)
- D. Severely decreased (little to no interest in any food source)

Please estimate approximately how much of your cat's normal food he/she is currently eating: \_\_\_\_\_ %

3. How often does your cat vomit?

- A. Never (no vomiting within past four weeks)
- B. 1 time or less per week
- C. 2-3 times per week
- D. >3 times per week

4. How would you describe your cat's stool?

- A. Normal (formed stool; able to be picked up)
- B. Slightly soft; presence of mucus or blood
- C. Very soft but still solid; with or without mucus or blood
- D. Liquid diarrhea; with or without mucus or blood

5. What is the frequency of your cat's defecation?

- A. Normal
- B. 2-3 times per day
- C. 4-5 times per day
- D. >5 times per day

6. Please estimate any weight loss: Total pounds lost: \_\_\_\_\_ lb and period of time: \_\_\_\_\_ weeks/months

OR No weight loss/weight gain: \_\_\_\_\_

**Please answer the following questions:**

1. How long has your cat been showing gastrointestinal signs (vomiting, diarrhea, weight-loss, decreased appetite)?

\_\_\_\_\_

2. Does your cat receive Heartworm/Flea prevention? \_\_\_\_\_ Brand? \_\_\_\_\_

3. Is your cat up-to-date on vaccinations? \_\_\_\_\_

4. What medications is your cat taking? \_\_\_\_\_

5. What food does your cat eat? \_\_\_\_\_

\_\_\_\_\_

6. What treats does your cat receive? \_\_\_\_\_

7. What supplements does your cat receive (e.g. glucosamine, probiotics)? \_\_\_\_\_

\_\_\_\_\_

8. What treatments has your cat received for his/her gastrointestinal problems?

---

---

And when were they last given? \_\_\_\_\_

---

9. What other medical conditions does your cat have? \_\_\_\_\_

---

1- Jergens AE, Crandell JM, Evans R, et al. A scoring index for disease activity in cats with chronic enteropathy. *J Vet Intern Med.* 2010;24:1027-1033.
